# Supplementary material for: Quantification of diaphragmatic dynamic dysfunction in septic patients by bedside ultrasound
Source: PubMed Central journal article supplement (PMC9569367; doi:10.1038/s41598-022-21702-6), 2022-10-15
Supplement: 41598_2022_21702_MOESM1_ESM.pdf [file 41598_2022_21702_MOESM1_ESM.pdf]

Supplement

**Quantification of Diaphragmatic Dynamic Dysfunction in Septic Patients  
by Bedside Ultrasound**

Yunqiu Chen<sup>1</sup> # , Yujia Liu<sup>2</sup> # , Mingxin Han<sup>3</sup>, Shuai Zhao<sup>3</sup>, Ya Tan<sup>3</sup>, Liying Hao<sup>4</sup>,  
Wenjuan Liu<sup>3</sup>, Wenyan Zhang<sup>3</sup>, Wei Song<sup>3</sup>, Mengmeng Pan<sup>3</sup>, Guangyu Jiao\*<sup>3</sup>

1. Department of Pulmonary and Critical Care Medicine, The Fourth Hospital of China Medical University, Shenyang, People's Republic of China, 110032

2. Liaoning University of Traditional Chinese Medicine, Shenyang, People's Republic of China, 110167

3. Department of Pulmonary and Critical Care Medicine, Shengjing Hospital of China Medical University, Shenyang, People's Republic of China, 110004

4. Department of Pharmaceutical Toxicology, School of Pharmaceutical Sciences, China Medical University, Shenyang, People's Republic of China, 110001

\*Corresponding author: Guangyu Jiao, E-mail: jiao\_gy@163.com

# Co-first authors contribute equally

About sample size:

We calculated the statistical power for each parameter by PASS software according to the existing sample size, the mean, and the overall standard deviation of each group. The results show that the statistical power of each parameter was close to or more than 0.9 (Table S1).

Table S1 Statistical power of each parameter

|                          | Power  | Total Sample Size | Base Subjects Per Group | Standard Deviation of Group Means( $\sigma_m$ ) | Standard Deviation ( $\sigma$ ) | Effect Size | Alpha |
|--------------------------|--------|-------------------|-------------------------|-------------------------------------------------|---------------------------------|-------------|-------|
| TF                       | 1.0000 | 181               | 33                      | 18.47                                           | 26.05                           | 0.709       | 0.05  |
| Excursion(QB)            | 1.0000 | 181               | 33                      | 2.26                                            | 4.77                            | 0.474       | 0.05  |
| Excursion(DB)            | 1.0000 | 181               | 33                      | 10.18                                           | 9.50                            | 1.072       | 0.05  |
| $E_{QB}/E_{DB}$          | 1.0000 | 181               | 33                      | 0.11                                            | 0.13                            | 0.808       | 0.05  |
| Inspiratory time(QB)     | 1.0000 | 181               | 33                      | 183.48                                          | 286.42                          | 0.641       | 0.05  |
| Inspiratory time(DB)     | 1.0000 | 181               | 33                      | 228.52                                          | 423.03                          | 0.540       | 0.05  |
| Contractile velocity(QB) | 0.9201 | 181               | 33                      | 0.13                                            | 0.47                            | 0.276       | 0.05  |
| Contractile velocity(DB) | 0.9982 | 181               | 33                      | 0.42                                            | 1.08                            | 0.391       | 0.05  |
| AUDMC(QB)                | 1.0000 | 181               | 33                      | 2.70                                            | 3.98                            | 0.679       | 0.05  |
| AUDMC(DB)                | 1.0000 | 181               | 33                      | 10.76                                           | 9.68                            | 1.112       | 0.05  |
| AUDMC(per minute)        | 0.9940 | 181               | 33                      | 26.40                                           | 73.09                           | 0.361       | 0.05  |
| Thickness                | 0.8958 | 181               | 33                      | 0.05                                            | 0.2                             | 0.265       | 0.05  |

Note: QB means quiet breathing and DB means deep breathing.

The detailed calculation is as follows:

TF

One-Way Analysis of Variance F-Tests

Numeric Results

Number of Groups: 3

|        | Total Sample Size | Group Sample Size Set | Base Subjects Per Group | Group Means Set | SD of Group Means | Std Dev  | Effect Size       | Alpha |
|--------|-------------------|-----------------------|-------------------------|-----------------|-------------------|----------|-------------------|-------|
| Power  | N                 | Ni Set                | Ni                      | $\mu_i$         | $\sigma_m$        | $\sigma$ | $\sigma_m/\sigma$ |       |
| 1.0000 | 181               | Ni(1)                 | 33                      | $\mu_i(1)$      | 18.47             | 26.05    | 0.709             | 0.050 |

Excursion (quiet breathing)

One-Way Analysis of Variance F-Tests

Numeric Results

Number of Groups: 3

|        | Total Sample Size | Group Sample Size Set | Base Subjects Per Group | Group Means Set | SD of Group Means | Std Dev  | Effect Size       | Alpha |
|--------|-------------------|-----------------------|-------------------------|-----------------|-------------------|----------|-------------------|-------|
| Power  | N                 | Ni Set                | Ni                      | $\mu_i$         | $\sigma_m$        | $\sigma$ | $\sigma_m/\sigma$ |       |
| 1.0000 | 181               | Ni(1)                 | 33                      | $\mu_i(1)$      | 2.26              | 4.77     | 0.474             | 0.050 |

## Excursion(deep breathing)

### One-Way Analysis of Variance F-Tests

#### Numeric Results

Number of Groups: 3

|                 | Total<br>Sample<br>Size<br>N | Group<br>Sample<br>Size<br>Set<br>Ni Set<br>Ni(1) | Base<br>Subjects<br>Per<br>Group<br>Ni | Group<br>Means<br>Set<br>$\mu$<br>$\mu(1)$ | SD of<br>Group<br>Means<br>$\sigma$<br>10.18 | Std<br>Dev<br>$\sigma$<br>9.50 | Effect<br>Size<br>$\sigma/\sigma$<br>1.072 | Alpha<br>0.050 |
|-----------------|------------------------------|---------------------------------------------------|----------------------------------------|--------------------------------------------|----------------------------------------------|--------------------------------|--------------------------------------------|----------------|
| Power<br>1.0000 | 181                          |                                                   | 33                                     |                                            |                                              |                                |                                            |                |

## $E_{QB}/E_{DB}$

### One-Way Analysis of Variance F-Tests

#### Numeric Results

Number of Groups: 3

|                 | Total<br>Sample<br>Size<br>N | Group<br>Sample<br>Size<br>Set<br>Ni Set<br>Ni(1) | Base<br>Subjects<br>Per<br>Group<br>Ni | Group<br>Means<br>Set<br>$\mu$<br>$\mu(1)$ | SD of<br>Group<br>Means<br>$\sigma$<br>0.11 | Std<br>Dev<br>$\sigma$<br>0.13 | Effect<br>Size<br>$\sigma/\sigma$<br>0.808 | Alpha<br>0.050 |
|-----------------|------------------------------|---------------------------------------------------|----------------------------------------|--------------------------------------------|---------------------------------------------|--------------------------------|--------------------------------------------|----------------|
| Power<br>1.0000 | 181                          |                                                   | 33                                     |                                            |                                             |                                |                                            |                |

## Inspiratory time(ms)--

## Quiet breathing

### One-Way Analysis of Variance F-Tests

#### Numeric Results

Number of Groups: 3

|                 | Total<br>Sample<br>Size<br>N | Group<br>Sample<br>Size<br>Set<br>Ni Set<br>Ni(1) | Base<br>Subjects<br>Per<br>Group<br>Ni | Group<br>Means<br>Set<br>$\mu$<br>$\mu(1)$ | SD of<br>Group<br>Means<br>$\sigma$<br>183.48 | Std<br>Dev<br>$\sigma$<br>286.42 | Effect<br>Size<br>$\sigma/\sigma$<br>0.641 | Alpha<br>0.050 |
|-----------------|------------------------------|---------------------------------------------------|----------------------------------------|--------------------------------------------|-----------------------------------------------|----------------------------------|--------------------------------------------|----------------|
| Power<br>1.0000 | 181                          |                                                   | 33                                     |                                            |                                               |                                  |                                            |                |

## Inspiratory time(ms)--

## Deep breathing

### One-Way Analysis of Variance F-Tests

#### Numeric Results

Number of Groups: 3

|                 | Total<br>Sample<br>Size<br>N | Group<br>Sample<br>Size<br>Set<br>Ni Set<br>Ni(1) | Base<br>Subjects<br>Per<br>Group<br>Ni | Group<br>Means<br>Set<br>$\mu$<br>$\mu(1)$ | SD of<br>Group<br>Means<br>$\sigma$<br>228.52 | Std<br>Dev<br>$\sigma$<br>423.03 | Effect<br>Size<br>$\sigma/\sigma$<br>0.540 | Alpha<br>0.050 |
|-----------------|------------------------------|---------------------------------------------------|----------------------------------------|--------------------------------------------|-----------------------------------------------|----------------------------------|--------------------------------------------|----------------|
| Power<br>1.0000 | 181                          |                                                   | 33                                     |                                            |                                               |                                  |                                            |                |

## Contractile velocity(mm/s)-- Quiet breathing

### One-Way Analysis of Variance F-Tests

#### Numeric Results

Number of Groups: 3

|       | Total<br>Sample<br>Size<br>N | Group<br>Sample<br>Size<br>Set<br>Ni Set | Base<br>Subjects<br>Per<br>Group<br>Ni | Group<br>Means<br>Set<br>$\mu$<br>$\mu_i(1)$ | SD of<br>Group<br>Means<br>$\sigma$<br>$\sigma_m$ | Std<br>Dev<br>$\sigma$ | Effect<br>Size<br>$\sigma_m/\sigma$ | Alpha |
|-------|------------------------------|------------------------------------------|----------------------------------------|----------------------------------------------|---------------------------------------------------|------------------------|-------------------------------------|-------|
| Power | 181                          | Ni(1)                                    | 33                                     | $\mu_i(1)$                                   | 0.13                                              | 0.47                   | 0.276                               | 0.050 |

## Contractile velocity(mm/s)-- Deep breathing

### One-Way Analysis of Variance F-Tests

#### Numeric Results

Number of Groups: 3

|       | Total<br>Sample<br>Size<br>N | Group<br>Sample<br>Size<br>Set<br>Ni Set | Base<br>Subjects<br>Per<br>Group<br>Ni | Group<br>Means<br>Set<br>$\mu$<br>$\mu_i(1)$ | SD of<br>Group<br>Means<br>$\sigma$<br>$\sigma_m$ | Std<br>Dev<br>$\sigma$ | Effect<br>Size<br>$\sigma_m/\sigma$ | Alpha |
|-------|------------------------------|------------------------------------------|----------------------------------------|----------------------------------------------|---------------------------------------------------|------------------------|-------------------------------------|-------|
| Power | 181                          | Ni(1)                                    | 33                                     | $\mu_i(1)$                                   | 0.42                                              | 1.08                   | 0.391                               | 0.050 |

## AUDMC(cm-s)-- Quiet breathing

### One-Way Analysis of Variance F-Tests

#### Numeric Results

Number of Groups: 3

|       | Total<br>Sample<br>Size<br>N | Group<br>Sample<br>Size<br>Set<br>Ni Set | Base<br>Subjects<br>Per<br>Group<br>Ni | Group<br>Means<br>Set<br>$\mu$<br>$\mu_i(1)$ | SD of<br>Group<br>Means<br>$\sigma$<br>$\sigma_m$ | Std<br>Dev<br>$\sigma$ | Effect<br>Size<br>$\sigma_m/\sigma$ | Alpha |
|-------|------------------------------|------------------------------------------|----------------------------------------|----------------------------------------------|---------------------------------------------------|------------------------|-------------------------------------|-------|
| Power | 181                          | Ni(1)                                    | 33                                     | $\mu_i(1)$                                   | 2.70                                              | 3.98                   | 0.679                               | 0.050 |

## AUDMC(cm-s)-- Deep breathing

### One-Way Analysis of Variance F-Tests

#### Numeric Results

Number of Groups: 3

|       | Total<br>Sample<br>Size<br>N | Group<br>Sample<br>Size<br>Set<br>Ni Set | Base<br>Subjects<br>Per<br>Group<br>Ni | Group<br>Means<br>Set<br>$\mu$<br>$\mu_i(1)$ | SD of<br>Group<br>Means<br>$\sigma$<br>$\sigma_m$ | Std<br>Dev<br>$\sigma$ | Effect<br>Size<br>$\sigma_m/\sigma$ | Alpha |
|-------|------------------------------|------------------------------------------|----------------------------------------|----------------------------------------------|---------------------------------------------------|------------------------|-------------------------------------|-------|
| Power | 181                          | Ni(1)                                    | 33                                     | $\mu_i(1)$                                   | 10.76                                             | 9.68                   | 1.112                               | 0.050 |

## AUDMC(cm-s)-- per minute

### One-Way Analysis of Variance F-Tests

#### Numeric Results

Number of Groups: 3

|        | Total<br>Sample<br>Size | Group<br>Sample<br>Size<br>Set | Base<br>Subjects<br>Per<br>Group | Group<br>Means<br>Set | SD of<br>Group<br>Means | Std<br>Dev | Effect<br>Size    |       |
|--------|-------------------------|--------------------------------|----------------------------------|-----------------------|-------------------------|------------|-------------------|-------|
| Power  | N                       | Ni Set                         | Ni                               | $\mu_i$               | $\sigma_m$              | $\sigma$   | $\sigma_m/\sigma$ | Alpha |
| 0.9940 | 181                     | Ni(1)                          | 33                               | $\mu_i(1)$            | 26.40                   | 73.09      | 0.361             | 0.050 |

## Thickness

### One-Way Analysis of Variance F-Tests

#### Numeric Results

Number of Groups: 3

|        | Total<br>Sample<br>Size | Group<br>Sample<br>Size<br>Set | Base<br>Subjects<br>Per<br>Group | Group<br>Means<br>Set | SD of<br>Group<br>Means | Std<br>Dev | Effect<br>Size    |       |
|--------|-------------------------|--------------------------------|----------------------------------|-----------------------|-------------------------|------------|-------------------|-------|
| Power  | N                       | Ni Set                         | Ni                               | $\mu_i$               | $\sigma_m$              | $\sigma$   | $\sigma_m/\sigma$ | Alpha |
| 1.0000 | 181                     | Ni(1)                          | 33                               | $\mu_i(1)$            | 0.05                    | 0.10       | 0.530             | 0.050 |
| 0.8958 | 181                     | Ni(1)                          | 33                               | $\mu_i(1)$            | 0.05                    | 0.20       | 0.265             | 0.050 |

### References

- 1.Desu, M. M. and Raghavarao, D. 1990. Sample Size Methodology. Academic Press. New York.
- 2.Fleiss, Joseph L. 1986. The Design and Analysis of Clinical Experiments. John Wiley & Sons. New York.
- 3.Kirk, Roger E. 1982. Experimental Design: Procedures for the Behavioral Sciences. Brooks/Cole. Pacific Grove, California.
